# Supplementary material
Source: Springer Nature journal article supplement (https://www.springermedizin.de/resource/supplementary/12885_2013_4169_MOESM1_ESM.pdf/9465630)

1 TR Vmax 3.09 m/s  
TR maxPG 58 mmHg

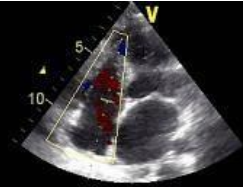

A

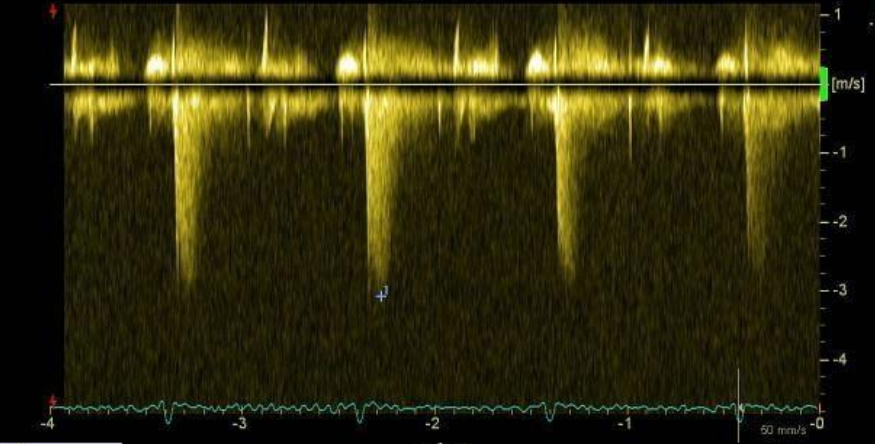

LVEF MOD A4C 68 %  
SV MOD A4C 40 ml  
2 LVLs A4C 5.4 cm  
LVESV MOD A4C 19 ml  
LVESV-I 14 ml  
1 LVLd A4C 7.1 cm  
LVEDV MOD A4C 59 ml  
LVEDV-I 42 ml

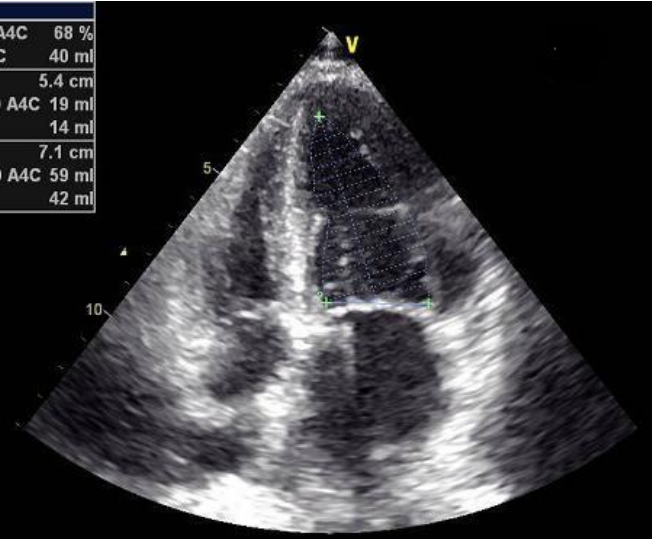

B

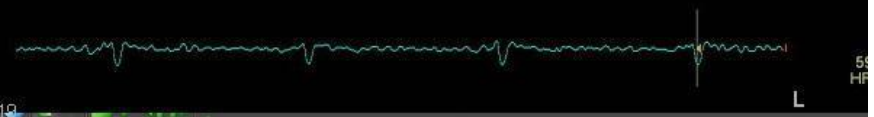

v 1.56 m/s  
p 9.71 mmHg

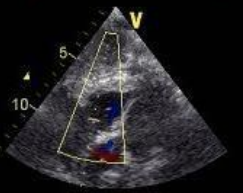

C

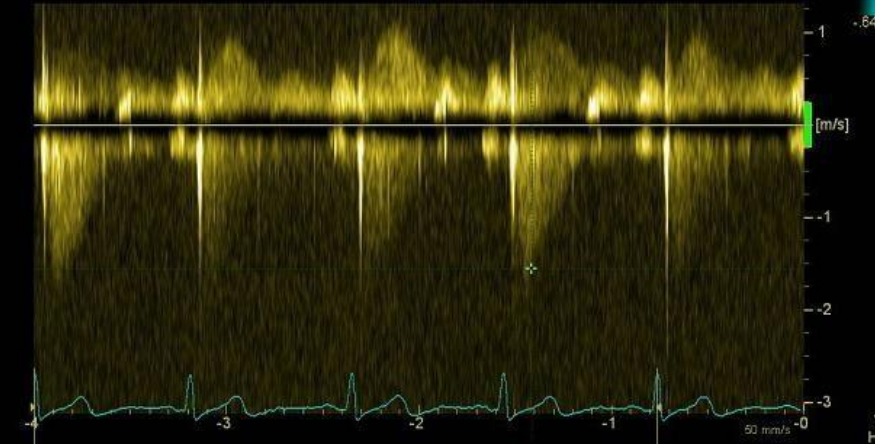

60 HR

12:12:19

75 HR

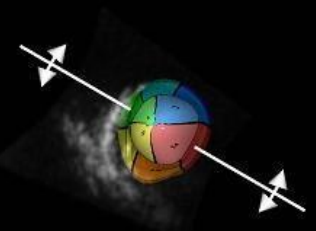

D

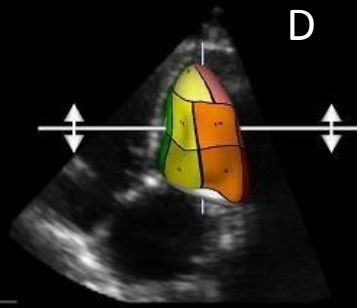

EDV 87.15 ml  
ESV 30.33 ml  
SV 56.81 ml  
EF 65.19 %  
SDI 16 3.7 %

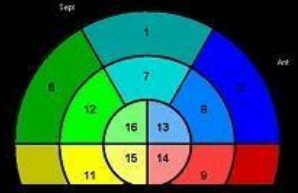

Supplement: MOESM1 [file 9465630]
